# Supplementary material for: Familial Hypercholesterolemia Genetic Variations and Long-Term Cardiovascular Outcomes in Patients with Hypercholesterolemia Who Underwent Coronary Angiography
Source: MDPI journal article supplement (doi:10.3390/genes12091413), 2021-09-14
Supplement: s1 [file s1]

**Supplementary Table S1.** Comparison clinical characteristics of FH pathogenic variant carriers, and FH pathogenic variant non-carriers in subjects with high blood LDL-C levels ( $\geq 190$  mg/dL) who underwent coronary angiography.

| Variables                          | FH pathogenic variant carriers | FH pathogenic variant non-carriers | P value |
|------------------------------------|--------------------------------|------------------------------------|---------|
| Number                             | 18                             | 89                                 |         |
| Age, years                         | 56.11 $\pm$ 12.88              | 59.04 $\pm$ 11.27                  | 0.328   |
| Men, n (%)                         | 15(83.3%)                      | 61(68.5%)                          | 0.329   |
| Body mass index, kg/m <sup>2</sup> | 28.6 $\pm$ 4.2                 | 26.3 $\pm$ 3.6                     | 0.018*  |
| Waist/Hip Ratio                    | 0.94 $\pm$ 0.06                | 0.93 $\pm$ 0.05                    | 0.634   |
| sBP, mmHg                          | 131 $\pm$ 20                   | 135 $\pm$ 21                       | 0.429   |
| dBP, mmHg                          | 81 $\pm$ 13                    | 79 $\pm$ 13                        | 0.615   |
| Triglycerides, mg/dL               | 237 $\pm$ 214                  | 180 $\pm$ 110                      | 0.289   |
| Cholesterol, mg/dL                 | 250 $\pm$ 61                   | 262 $\pm$ 64                       | 0.433   |
| LDL-C, mg/dL                       | 215 $\pm$ 25                   | 218 $\pm$ 36                       | 0.794   |
| HDL-C, mg/dL                       | 44 $\pm$ 14                    | 47 $\pm$ 12                        | 0.414   |
| HbA1c, %                           | 6.25 $\pm$ 1.62                | 6.31 $\pm$ 1.43                    | 0.888   |
| Creatinine, mg/dL                  | 1.07 $\pm$ 0.16                | 1.42 $\pm$ 1.78                    | 0.420   |
| eGFR, mL/min/1.73 m <sup>2</sup>   | 75 $\pm$ 16                    | 76 $\pm$ 30                        | 0.845   |
| Smoking, n (%)                     | 10(55.6%)                      | 40(44.9%)                          | 0.573   |
| DM, n (%)                          | 5(27.8%)                       | 20(22.5%)                          | 0.760   |
| Hypertension, n (%)                | 10(55.6%)                      | 50(56.2%)                          | 1.000   |
| CAD, n (%)                         | 18(100.0%)                     | 72(80.9%)                          | 0.070   |
| Early CAD, n (%)                   | 8(44.4%)                       | 13(14.6%)                          | 0.008** |

Chi-square test, n(%) or Independent t test, Mean $\pm$ SD. \* $p$ <0.05, \*\* $p$ <0.01

**Supplementary Table S2.** Comparison of the major adverse cardiac events (MACEs) between the FH variant carriers, *LDLR* c.986G>A/c.268G>A variant carriers†, and FH pathogenic variant non-carriers among the subjects with high blood LDL-C levels who underwent coronary angiography.

| Variable                      | FH pathogenic variant carriers | <i>LDLR</i> c.986G>A/c.268G>A variant carriers | FH pathogenic variant non-carriers | <i>p</i> Value <sup>1</sup> | <i>p</i> value <sup>2</sup> |
|-------------------------------|--------------------------------|------------------------------------------------|------------------------------------|-----------------------------|-----------------------------|
| Number                        | 41                             | 9                                              | 244                                |                             |                             |
| <b>All-cause death, n (%)</b> | 7(17.1%)                       | 1(11.1%)                                       | 34(13.9%)                          | 0.772                       | 1.000                       |
| CV death, n (%)               | 1(2.4%)                        | 1(11.1%)                                       | 7(2.9%)                            | 1.000                       | 0.255                       |
| Non-CV death, n (%)           | 6(14.6%)                       | 0(0.0%)                                        | 27(11.1%)                          | 0.596                       | 0.603                       |
| <b>Nonfatal MI, n (%)</b>     | 3(7.3%)                        | 1(11.1%)                                       | 10(4.1%)                           | 0.334                       | 0.410                       |
| Q-Wave, n (%)                 | 2(4.9%)                        | 1(11.1%)                                       | 4(1.6%)                            | 0.167                       | 0.208                       |
| Non-Q-Wave, n (%)             | 1(2.4%)                        | 0(0.0%)                                        | 6(2.5%)                            | 1.000                       | 1.000                       |
| <b>Nonfatal stroke, n (%)</b> | 0(0.0%)                        | 0(0.0%)                                        | 1(0.4%)                            | 1.000                       | 1.000                       |
| Ischemic, n (%)               | 0(0.0%)                        | 0(0.0%)                                        | 1(0.4%)                            | 1.000                       | 1.000                       |
| Hemorrhagic, n (%)            | 0(0.0%)                        | 0(0.0%)                                        | 0(0.0%)                            | --                          | --                          |

*p* Value<sup>1</sup>: FH pathogenic variant carriers (n=41) compared with FH pathogenic variant non-carriers (n=244). *p* Value<sup>2</sup>: *LDLR* c.986G>A/*LDLR* c.268G>A variant carriers (n=9) compared with FH pathogenic variant non-carriers (n=244). †: *LDLR* c.986G>A/c.268G>A variant carriers stand for those patients who carry either a *LDLR* c.986G>A heterozygotic variant or a *LDLR* c.268G>A heterozygotic variant.

**Supplementary Table S3.** Blood low-density lipoprotein cholesterol (LDL-C) levels and age of the men among carriers of the top five most frequent FH variants.

| <b>Variant</b>         | <b>LDL-C, mg/dL</b> | <b>Age, years</b> |
|------------------------|---------------------|-------------------|
| <i>LDLR</i> c.986G>A   | 214±25              | 55.7±11.9         |
| <i>LDLR</i> c.268G>A   | 212±29              | 39.0±1.7          |
| <i>LDLR</i> c.1747C>T  | 189±22              | 62.3±13.8         |
| <i>LDLR</i> c.1867A>G  | 179±10              | 69.7±22.2         |
| <i>APOB</i> c.10579C>T | 182±10              | 59.3±16.5         |

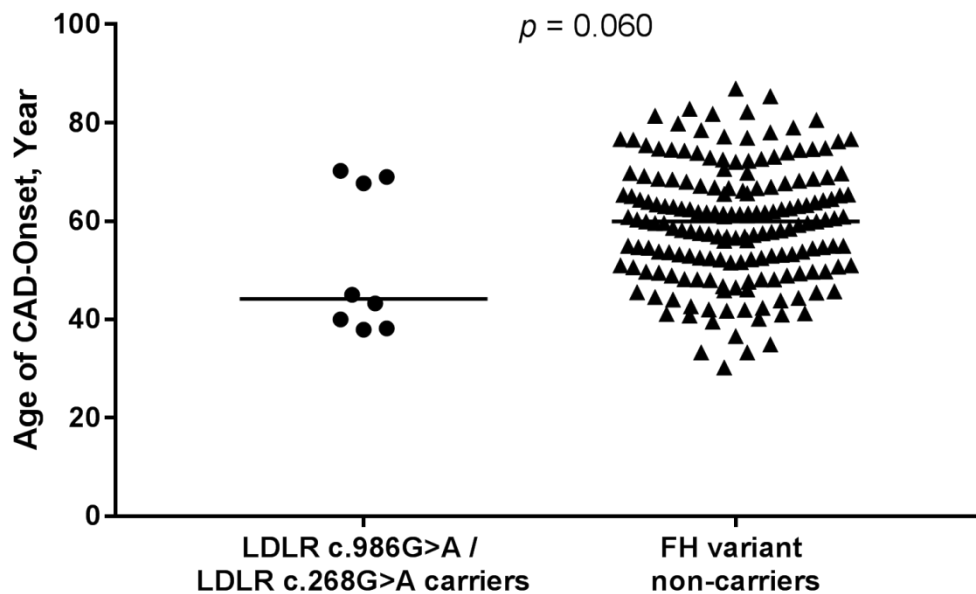

**Supplementary Figure S1.** Age of coronary artery disease (CAD) onset in the subjects who were low-density lipoprotein cholesterol receptor (*LDLR*) c.986G>A/*LDLR* c.268G>A variant carriers (n=8) and familial hypercholesterolemia (FH) variant non-carriers (n=175). The centerline in the dot plot represents the median. The statistical analysis was performed with analysis of variance.
